# Supplementary material for: Graphene nanopores: electronic transport properties and design methodology
Source: Royal Society of Chemistry journal article supplement (doi:10.1039/c3cp53777c), 2013-12-03
Supplement: c3cp53777c.pdf [file c3cp53777c.pdf]

## Electronic Supplementary Information (ESI)

### Graphene nanopores: electronic transport properties and design methodology

Wanzhi Qiu,<sup>1b</sup> Phuong Nguyen<sup>a2</sup> and Efstratios Skafidas<sup>\*ab</sup>

#### SI 1. Transmission spectra of aGNPs

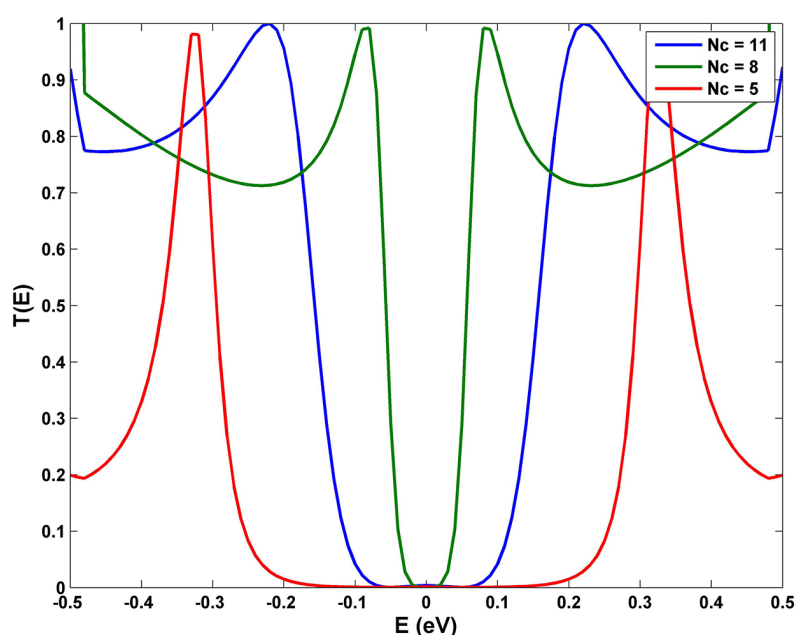

**Figure S1** Transmission spectra of aGNPs with perfect (unbroken) pore edges created with a  $Na=29$  aGR. The pore length  $Lc = 3$  is fixed and pore width ( $Na-2Nc$ ) is varying as  $Nc$  is altered. The change in the pore width leads to changes in the width of the “U”-shaped transmission spectrum around the Fermi energy. The aGNP remains semi-conducting when pore width is changed.

<sup>1</sup> National ICT Australia, Department of Electrical and Electronic Engineering, The University of Melbourne, Parkville, Victoria 3010, Australia

<sup>2</sup> Centre for Neural Engineering, The University of Melbourne, 203 Bouverie Street, Carlton, Victoria 3053, Australia. E-mail: [sskaf@unimelb.edu.au](mailto:sskaf@unimelb.edu.au)

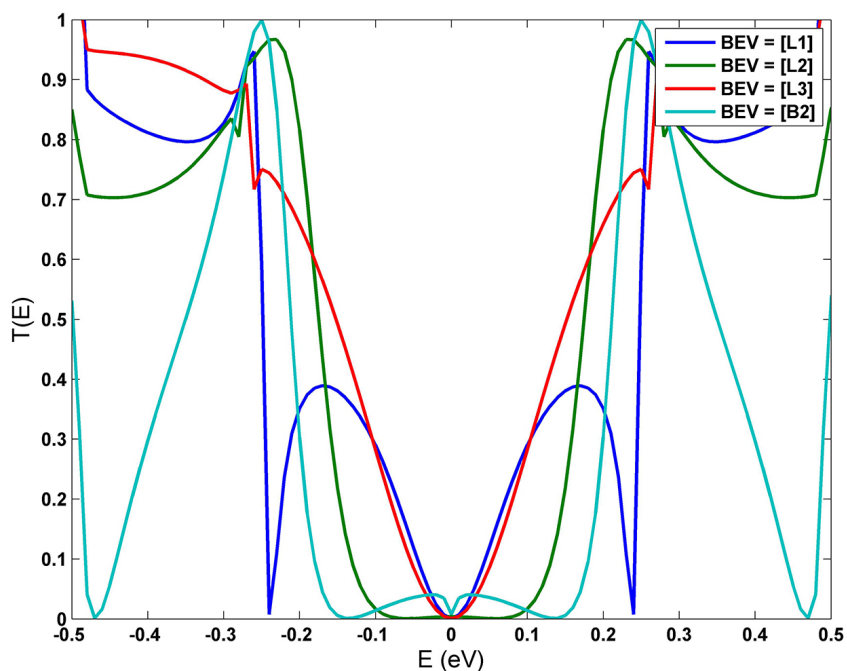

**Figure S2 Transmission spectra of aGRs with one broken pore edge created with a  $Na=29$  aGR.** The pore length  $L_c$  and width ( $Na-2N_c=7$ ) are fixed by  $L_c=3$  and  $N_c=11$ . Removing a tip atom of the zigzag edge ( $BEV = [L1]$  or  $BEV = [L3]$ ) leads to “V”-shaped transmission spectra. The aGNP remains semi-conducting when only one pore edge is broken.

## SI 2. Transmission spectra and LDOS

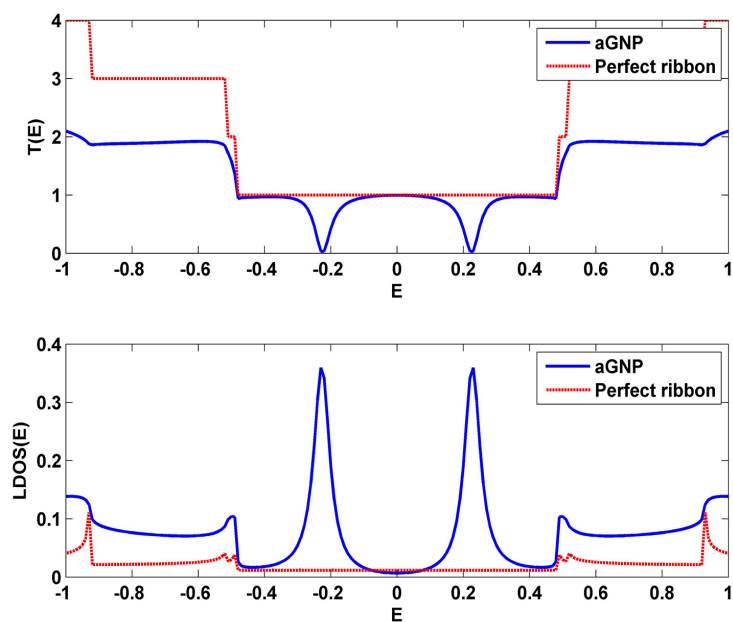

**Figure S3** Transmission spectra and LDOS of perfect ribbon and aGNP in Fig. 2b with “ $\cap$ ”-shaped transmission (*i.e.*, with BEV=[L1, R5].) **a**, The transmission spectra. **b**, LDOS at the pore-edge atom located at L3. (See Fig.1 for pore geometries.)

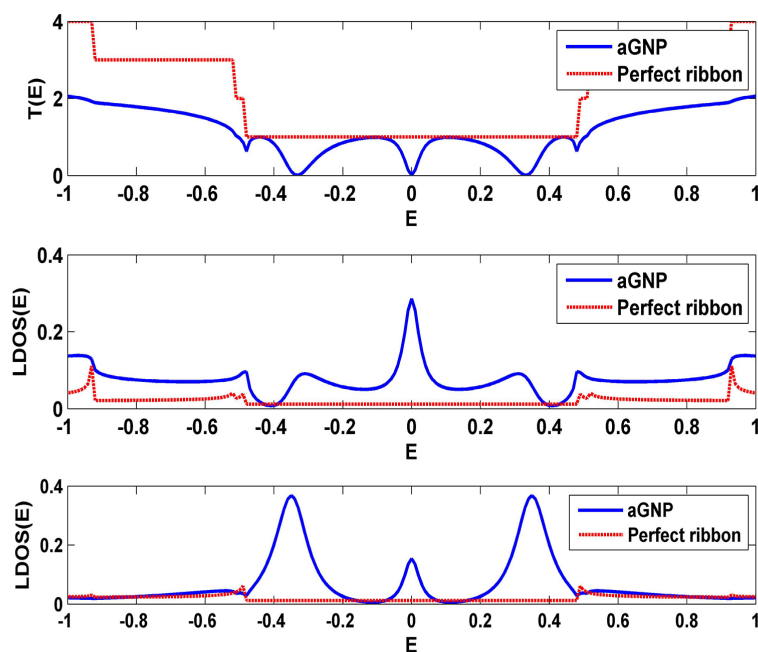

**Figure S4** Transmission spectra and LDOS of perfect ribbon and the aGNP in Fig. 2b

with “M”-shaped transmission (i.e., with BEV=[L1, R3, T3].) a, The transmission spectra.

b, LDOS at the pore-edge atoms located at L3. c, LDOS at the pore-edge atoms located at T6.

(See Fig.1 for pore geometries.)

### SI 3. Derivation of transmission spectrum of the system shown in Fig. 3a

The QW has one conduction band with dispersion relation  $E=2t_0\cos(ka)$ , where  $E$  is the energy of electrons,  $t_0$  the hopping coefficient in the QW,  $k$  the wave number and  $a$  the lattice spacing. To calculate the transmission of this system, we assume that the electrons are described by a plane wave incident from the far left with unit amplitude and a reflection

amplitude  $r$ . At the far right the wave has a transmission amplitude  $t$ . The probability amplitude to find the electron on site  $j$  of the QW in the state  $k$  can, therefore, be written as<sup>1</sup>:

$$a_j = e^{ikja} + re^{-ikja}, \quad j \leq 0 \quad (1)$$

$$a_j = te^{ikja}, \quad j \geq L \quad (2)$$

where  $i$  is the imaginary unit. Solving the two equations obtained by setting  $j=0$  and  $j=-1$  respectively in (1) leads to

$$a_{-1} = -2i \sin(ka) + a_0 e^{ika}. \quad (3)$$

Similarly the equations of (2) on sites  $j=L$  and  $j=L+1$  leads to

$$a_{L+1} = a_L e^{ika}. \quad (4)$$

By defining  $\tau = -E/t_0$ , the Schrödinger equations on other sites of the QW are given by

$$-\tau a_j = a_{j-1} + a_{j+1}, \quad j = 1, \dots, L-1. \quad (5)$$

Now consider the left QDC. The probability amplitude,  $b_l$ , to find the electron in the state  $l$  of the QDC obeys the following Schrödinger equations:

$$Eb_1 = \varepsilon_1 b_1 + V_1 b_2 + t_1 a_0, \quad (6)$$

$$Eb_l = \varepsilon_l b_l + V_1 b_{l-1} + V_1 b_{l+1}, \quad l = 2, \dots, N_1 - 1, \quad (7)$$

$$Eb_{N_1} = \varepsilon_{N_1} b_{N_1} + V_1 b_{N_1-1}. \quad (8)$$

Iterating backwards the equation for  $b_{N_1}$  we can express  $b_l$  in terms of  $a_0$ .

$$b_1 = \frac{t_1 a_0}{D_1}, \quad (9)$$

where

$$D_1 = Q_{N_1}(\varepsilon_1, V_1, N_1), \quad (10)$$

with  $Q_{N_1}$  defined by

$$Q_1(\varepsilon, V, N) = E - \varepsilon, \quad (11)$$

$$Q_n(\varepsilon, V, N) = E - \varepsilon - \frac{V^2}{Q_{n-1}(\varepsilon, V, N)} \quad n = 2, \dots, N. \quad (12)$$

Inserting (9) into the following Schrödinger equation on site  $j=0$  of the QW:

$$Ea_0 = t_0 a_{-1} + t_0 a_1 + t_1 b_1 \quad (13)$$

leads to

$$-\tau_1 a_0 = a_{-1} + a_1, \quad (14)$$

where  $\tau_1 = -(E - \frac{t_1^2}{D_1})/t_0$ .

Similarly, working on the right QDC and site  $j=L$  of the QW, we have

$$-\tau_2 a_L = a_{L-1} + a_{L+1}, \quad (15)$$

where  $\tau_2 = -(E - \frac{t_1^2}{D_2})/t_0$  with  $D_2 = Q_{N_2}(\varepsilon_2, V_2, N_2)$ .

The system transmission spectrum  $T(E) = |t|^2$  can then be computed by solving the set of  $L+3$  equations (3)-(5), (14) and (15) for the transmission amplitude  $t$  using Cramer's rule, with the result given by

$$t = \frac{-2i \sin(ka)}{e^{ikLa} \Delta},$$

where

$$\Delta = -(\tau_1 + e^{ika})(\tau_2 + e^{ika})\Delta_{L-1} + (\tau_1 + \tau_2 + 2e^{ika})\Delta_{L-2} - \Delta_{L-3},$$

with  $\Delta_K$  being the  $K \times K$  determinant

$$\Delta_K = \begin{vmatrix} \tau & 1 & 0 & \cdots & 0 \\ 1 & \tau & 1 & \cdots & 0 \\ & \ddots & \ddots & \ddots & \\ 0 & \cdots & 1 & \tau & 1 \\ 0 & \cdots & 0 & 1 & \tau \end{vmatrix}.$$

## References

1. Datta, S. *Quantum Transport: Atom to Transistor* (Cambridge University Press, Cambridge, 2005).
